# Supplementary material for: Effects of Microwave Treatment on Structure, Functional Properties and Antioxidant Activities of Germinated Tartary Buckwheat Protein
Source: MDPI journal article supplement (doi:10.3390/foods11101373), 2022-05-10
Supplement: s1 [file s1]

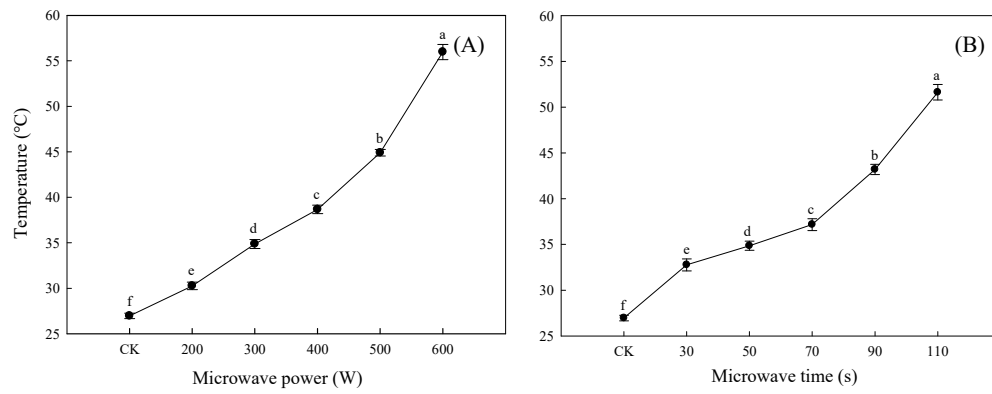

**Figure S1.** Effect of microwave treatment on surface temperature of Tartary buckwheat seeds. **(A)** microwave time (50 s); **(B)** microwave power (300 W). Different lowercase letters indicate significant differences between the different microwave treatment groups ( $p < 0.05$ ).
